# Supplementary material for: Enhancing equality, diversity, and inclusion in the undergraduate medicine curriculum: staff and student perspectives
Source: Research Square preprint supplement (doi:10.21203/rs.3.rs-7982081/v1), 2025-12-10
Supplement: Supplementary file 1 [file 1d37c45875702e0ef0ba1c4c.docx]

**Appendix S1**

**Student version of online questionnaire**

*Answer options were presented in a check box format

**Demographic information**

1. What year of your BMBS degree are you currently in?*

- Year 1
- Year 2

2. What is your age in years? Leave blank if you prefer not to say [free text answer]

3. Please self-describe your ethnicity - leave blank if you prefer not to say [free text answer]

4. Please self-describe your religion/belief - leave blank if you prefer not to say [free text answer]

5. Please self-describe your gender - leave blank if you prefer not to say [free text answer]

6. Is your current gender identity the same as the one you were assigned at birth?*

- Yes
- No
- Prefer not to answer

7. Please self-describe your sexual orientation - leave blank if you prefer not to say [free text answer]

8a. Do you consider yourself to have a disability?*

- Yes
- No

8b. If you answered yes to 8a please self-describe your disability - leave blank if you prefer not to say [free text answer]

9. Please self-describe your socioeconomic background - leave blank if you prefer not to say [free text answer]

10. Please complete the questionnaire based on the BMBS content that you have encountered since starting your BMBS course.

|  | **Strongly agree** | **Agree** | **Neither agree or disagree** | **Disagree** | **Strongly disagree** |
| --- | --- | --- | --- | --- | --- |
| **I am aware of the appropriate (i.e. not offensive/harmful) language to use in relation to…** | | | | | |
| Ethnicity/race |  |  |  |  |  |
| Religion/beliefs |  |  |  |  |  |
| Disability |  |  |  |  |  |
| Gender identity |  |  |  |  |  |
| Sexual orientation |  |  |  |  |  |
| Socioeconomic status |  |  |  |  |  |
|  | | | | | |
| **I feel confident discussing with my peers health issues related to…** | | | | | |
| Ethnicity/race |  |  |  |  |  |
| Religion/beliefs |  |  |  |  |  |
| Disability |  |  |  |  |  |
| Gender identity |  |  |  |  |  |
| Sexual orientation |  |  |  |  |  |
| Socioeconomic factors |  |  |  |  |  |
|  | | | | | |
| **Healthcare issues related to the following topic/group of people are fully represented in the BMBS teaching content*** | | | | | |
| Ethnicity/race |  |  |  |  |  |
| Religion/beliefs |  |  |  |  |  |
| Disability |  |  |  |  |  |
| Gender identity |  |  |  |  |  |
| Sexual orientation |  |  |  |  |  |
| Socioeconomic factors |  |  |  |  |  |
|  |  |  |  |  |  |
| **I feel I have sufficient knowledge about health issues related to the following topic/group of people for my stage of training** | | | | | |
| Ethnicity/race |  |  |  |  |  |
| Religion/beliefs |  |  |  |  |  |
| Disability |  |  |  |  |  |
| Gender identity |  |  |  |  |  |
| Sexual orientation |  |  |  |  |  |
| Socioeconomic factors |  |  |  |  |  |
|  |  |  |  |  |  |
| **I would like more teaching about healthcare topics related to…** | | | | | |
| Ethnicity/race |  |  |  |  |  |
| Religion/beliefs |  |  |  |  |  |
| Disability |  |  |  |  |  |
| Gender identity |  |  |  |  |  |
| Sexual orientation |  |  |  |  |  |
| Socioeconomic factors |  |  |  |  |  |
|  |  |  |  |  |  |

*teaching content includes LSRC sessions, lectures, PBL and clinical skills.

11. Is there the opportunity to raise and discuss issues of equality, diversity and inclusion (EDI) during your degree?*

- Yes - an example is asked for
- No - an additional question asked if there could be an opportunity to discuss the issues and if so, what this would this be [free text answer]

12. How do you think it is best to incorporate EDI into your medical curriculum?

[free text answer]

**Staff version of online questionnaire**

*Answer options were presented in a check box format

**Demographic information**

1. Which BMBS year(s) do you teach on (choose all that apply)?*

- Year 1
- Year 2

2. Which topic(s) do you teach (choose all that apply)?*

- Anatomy
- Physiology
- Biomedical science
- Psychology/sociology/public health
- Clinical skills
- PBL

3. What is your age in years? Leave blank if you prefer not to say [free text answer]

4. Please self-describe your ethnicity - leave blank if you prefer not to say [free text answer]

5. Please self-describe your religion/belief - leave blank if you prefer not to say [free text answer]

6. Please self-describe your gender - leave blank if you prefer not to say [free text answer]

7. Is your current gender identity the same as the one you were assigned at birth?*

- Yes
- No
- Prefer not to answer

8. Please self-describe your sexual orientation - leave blank if you prefer not to say [free text answer]

9a. Do you consider yourself to have a disability?*

- Yes
- No

9b. If you answered yes to 9a please self-describe your disability - leave blank if you prefer not to say [free text answer]

10. Please self-describe your socioeconomic background - leave blank if you prefer not to say [free text answer]

11. Please complete the questionnaire based on the BMBS content that you teach in year 1 and/or 2 of the medical curriculum.

|  | **Strongly agree** | **Agree** | **Neither agree or disagree** | **Disagree** | **Strongly disagree** |
| --- | --- | --- | --- | --- | --- |
| **I am aware of the appropriate (i.e not offensive/harmful) language to use in relation to…** | | | | | |
| Ethnicity/race |  |  |  |  |  |
| Religion/beliefs |  |  |  |  |  |
| Disability |  |  |  |  |  |
| Gender identity |  |  |  |  |  |
| Sexual orientation |  |  |  |  |  |
| Socioeconomic status |  |  |  |  |  |
|  | | | | | |
| **I feel confident discussing with students health issues related to…** | | | | | |
| Ethnicity/race |  |  |  |  |  |
| Religion/beliefs |  |  |  |  |  |
| Disability |  |  |  |  |  |
| Gender identity |  |  |  |  |  |
| Sexual orientation |  |  |  |  |  |
| Socioeconomic factors |  |  |  |  |  |
|  | | | | | |
| **Healthcare issues related to the following topic/group of people are fully represented in the BMBS teaching content*** | | | | | |
| Ethnicity/race |  |  |  |  |  |
| Religion/beliefs |  |  |  |  |  |
| Disability |  |  |  |  |  |
| Gender identity |  |  |  |  |  |
| Sexual orientation |  |  |  |  |  |
| Socioeconomic factors |  |  |  |  |  |
|  |  |  |  |  |  |
| **I feel I have sufficient knowledge to teach students about health issues related to the following topic/group of people** | | | | | |
| Ethnicity/race |  |  |  |  |  |
| Religion/beliefs |  |  |  |  |  |
| Disability |  |  |  |  |  |
| Gender identity |  |  |  |  |  |
| Sexual orientation |  |  |  |  |  |
| Socioeconomic factors |  |  |  |  |  |
|  | | | | | |
| **I would like more guidance about healthcare topics related to…** | | | | | |
| Ethnicity/race |  |  |  |  |  |
| Religion/beliefs |  |  |  |  |  |
| Disability |  |  |  |  |  |
| Gender identity |  |  |  |  |  |
| Sexual orientation |  |  |  |  |  |
| Socioeconomic factors |  |  |  |  |  |
|  |  |  |  |  |  |

*teaching content includes LSRC sessions, lectures, PBL and clinical skills.

12. Is there the opportunity for you to include issues of equality, diversity and inclusivity (EDI) into your teaching content?

- Yes - an example is asked for
- No - an additional question asked if there could be an opportunity to discuss the issues and if so, what this would this be [free text answer]

13. How do you think it is best to incorporate EDI into the medical curriculum?

[free text answer]
