# Supplementary material for: Enhancing equality, diversity, and inclusion in the undergraduate medicine curriculum: staff and student perspectives
Source: Research Square preprint supplement (doi:10.21203/rs.3.rs-7982081/v1), 2025-12-10
Supplement: Supplementary file 2 [file 9f7a52b34eb554e2b640c8b0.docx]

**Appendix S2: Curriculum review form**

**Session information**

*Answer options were presented in a check box format

1. Session type*

- Clinical skills
- Lecture
- LSRC
- PBL

2. Session title [free text answer]

3. Year group*

- Year 1
- Year 2

**Current theme representation**

4. Please indicate on a scale of 0-1 whether the following themes are represented in the session

For each theme, please indicate the extent to which they are represented in the session content using a scale of 0 to 1 as follows:

**0**=No representation (the theme is not mentioned in the session)
**0.5** = Partial (some representation of the theme e.g. photos, name of patients. However, the theme is not adequately represented to gain skills or knowledge related to how it may affect patient experience in accessing health care or how it impacts their health and wellbeing)
**1**= Full (the theme is explored adequately to gain skills or knowledge related to how it may affect patient experience in accessing healthcare or how it impacts their health and wellbeing. For example the session explores how ethnicity may impact on patient presentation and/or how the ethnicity of a patient impacts on their ability to access healthcare)

|  | **0** | **0.5** | **1** |
| --- | --- | --- | --- |
| Ethnicity/race |  |  |  |
| Religion/beliefs |  |  |  |
| Disability |  |  |  |
| Gender identity |  |  |  |
| Sexual orientation |  |  |  |
| Socioeconomic status |  |  |  |

5. For each theme given a score or 0.5 or 1, please outline how the theme is represented in the session (e.g. use of images, incorporated into a case discussion etc) [free text answer]

**Potential development(s)**

6. Is there an opportunity to incorporate the following themes into the session?

|  | **Yes** | **No** | **Not sure** | **Already incorporated** |
| --- | --- | --- | --- | --- |
| Ethnicity/race |  |  |  |  |
| Religion/beliefs |  |  |  |  |
| Disability |  |  |  |  |
| Gender identity |  |  |  |  |
| Sexual orientation |  |  |  |  |
| Socioeconomic status |  |  |  |  |

7. For each theme given a 'Yes' or 'Not sure' response please outline how the theme could potentially be incorporated into the session [free text answer}
